# Supplementary material for: Walnut protein hydrolysates ameliorate alcohol-induced cognitive impairment (AICI) by alleviating oxidative stress and inflammation in the brain and improving hippocampal synaptic plasticity in Sprague–Dawley rats
Source: Royal Society of Chemistry journal article supplement (doi:10.1039/d2fo01709a), 2022-01-01
Supplement: d2fo01709a1.zip [file d2fo01709a1.zip]

## Sheet: Sheet1
	p-ERK/ERK			Bcl-2/actin			Bax/actin			Caspase-3/actin
group	1	2	3	1	2	3	1	2	3	1	2	3
Control	0.58	0.52	0.55	0.38	0.39	0.35	0.88	0.85	0.83	0.87	0.82	0.86
Alcohol	0.25	0.21	0.29	0.17	0.18	0.2	1.45	1.42	1.5	1.27	1.31	1.34
WPH-L	0.28	0.23	0.26	0.23	0.21	0.26	0.68	0.69	0.72	1.13	1.23	1.17
WPH-M	0.36	0.31	0.39	0.11	0.15	0.11	0.61	0.63	0.61	0.91	0.87	0.95
WPH-H	0.49	0.42	0.43	0.31	0.32	0.38	0.49	0.52	0.46	0.89	0.91	0.92
