# Supplementary figures and images for: Walnut protein hydrolysates ameliorate alcohol-induced cognitive impairment (AICI) by alleviating oxidative stress and inflammation in the brain and improving hippocampal synaptic plasticity in Sprague–Dawley rats
Source: Royal Society of Chemistry journal article supplement (doi:10.1039/d2fo01709a), 2022-01-01

1 2 3 4 5

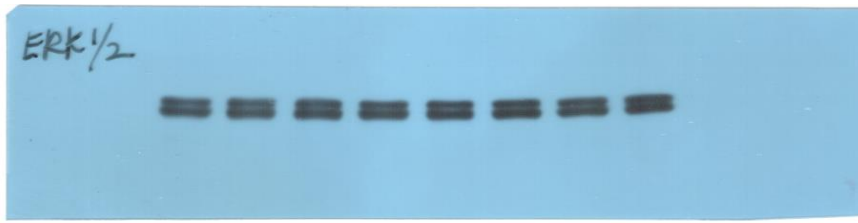

1. Normal group;
2. Alcohol group;
3. WPH-L group;
4. WPH-M group;
5. WPH-H group

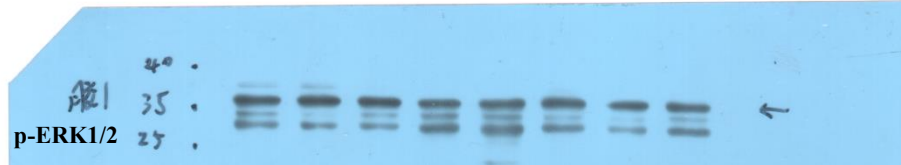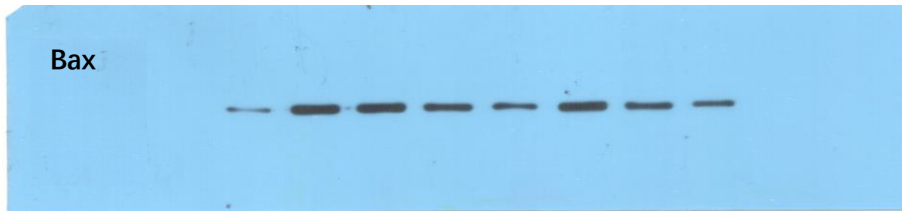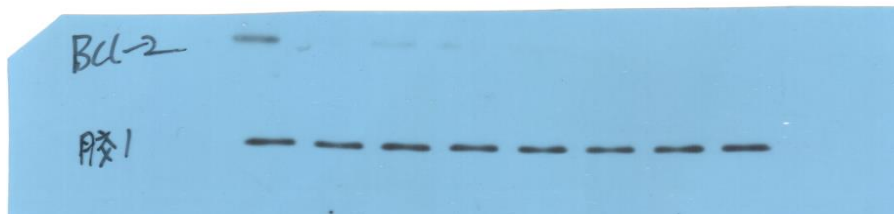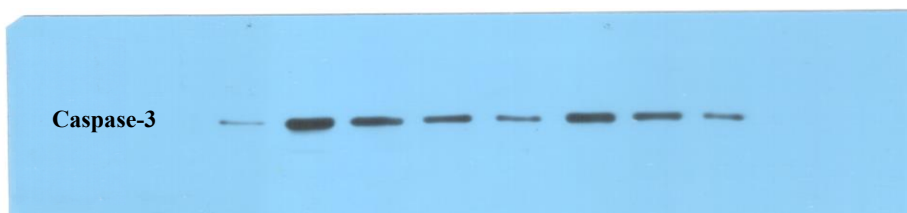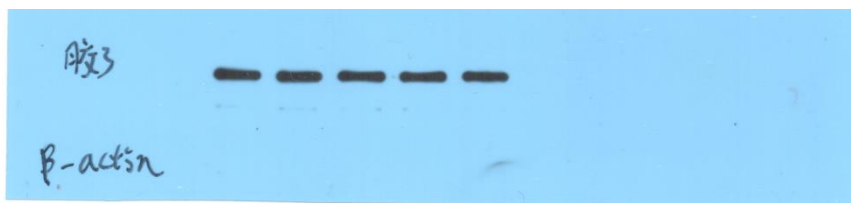

Supplement: d2fo01709a1.zip [file d2fo01709a1.zip]

1 2 3 4 5

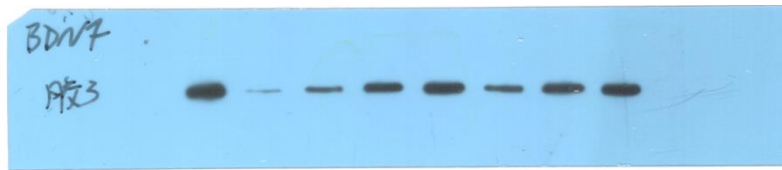

1. Normal group;
2. Alcohol group;
3. WPH-L group;
4. WPH-M group;
5. WPH-H group

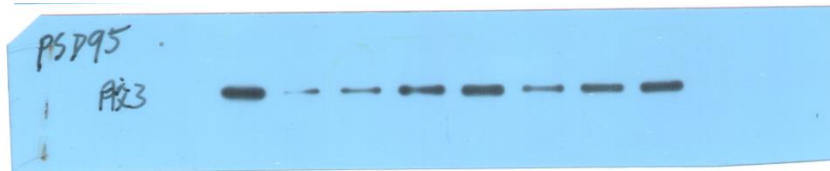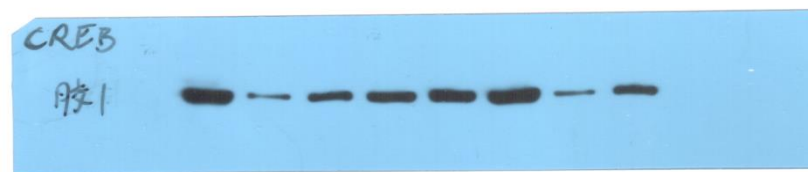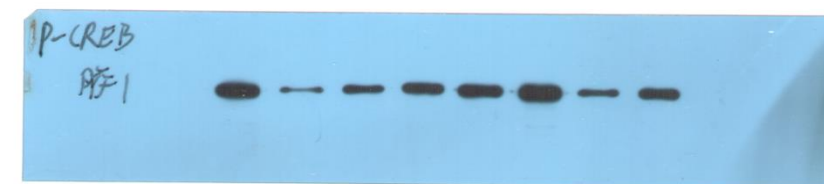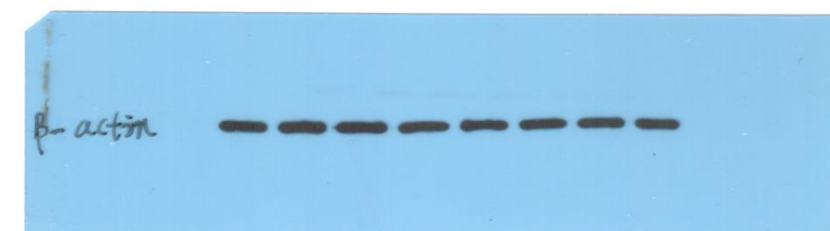

Supplement: d2fo01709a1.zip [file d2fo01709a1.zip]
